# Supplementary material
Source: PubMed Central journal article supplement (PMC423227)

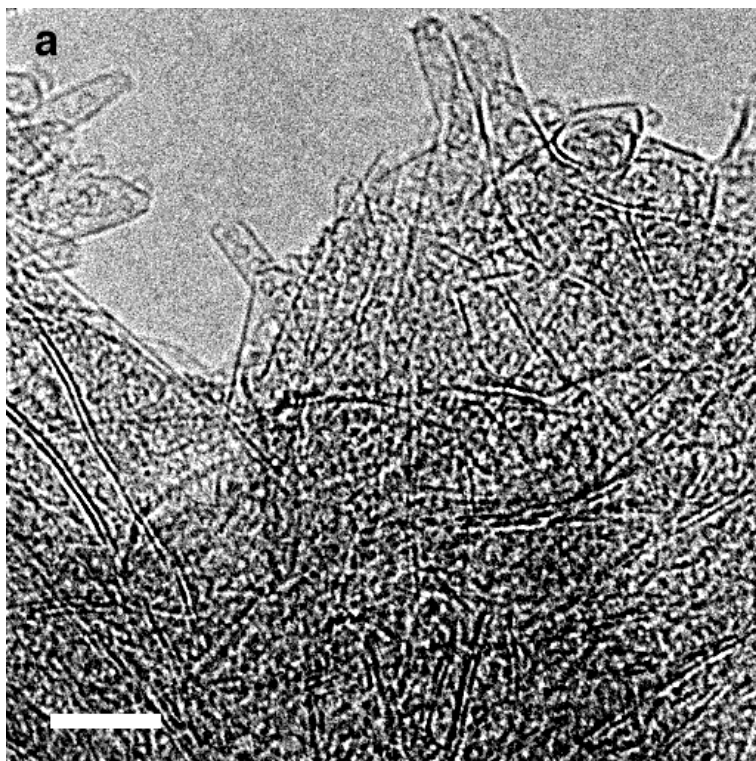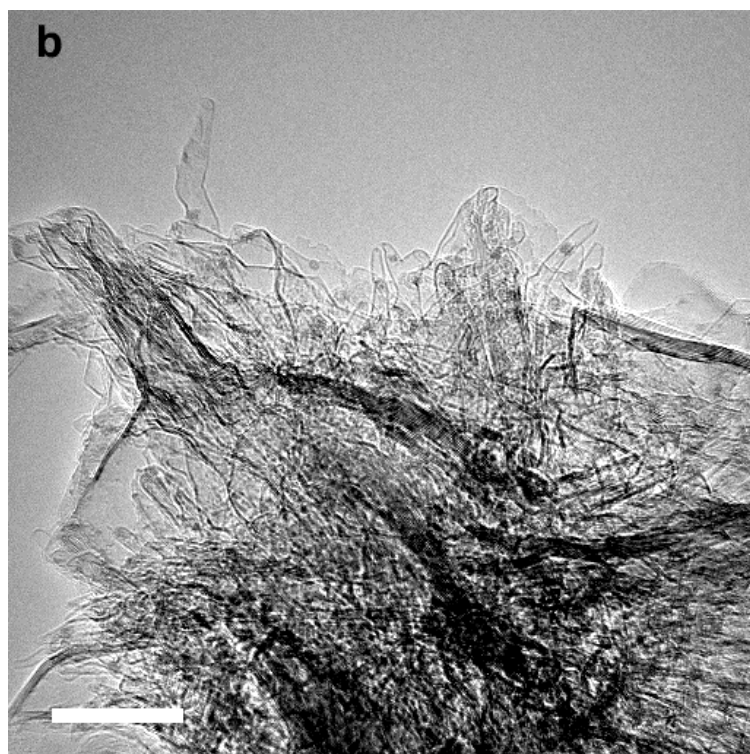

Supplement: pnas_101_23_8527__1.pdf [file pnas_101_23_8527__1.pdf]

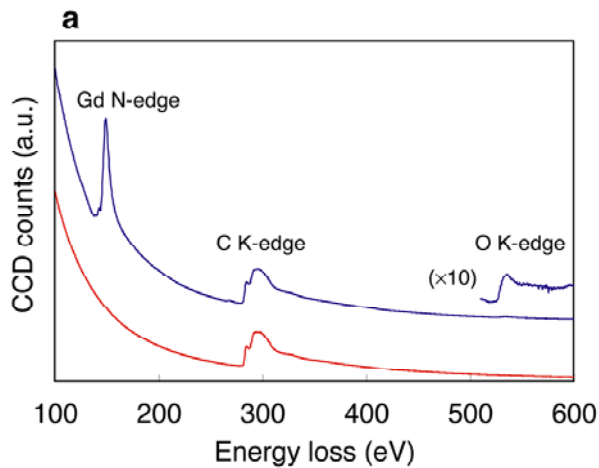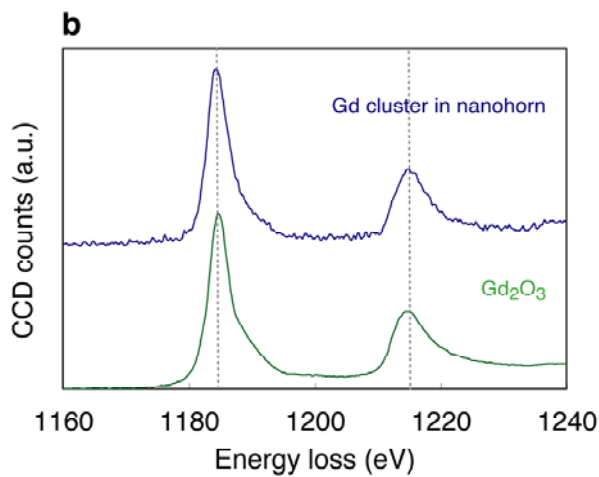

Supplement: pnas_101_23_8527__2.pdf [file pnas_101_23_8527__2.pdf]
